# Supplementary material for: Insitu growth of Rh nanoparticles with controlled sizes and dispersions on the cross-linked PVA–PEI nanofibers and their electrocatalytic properties towards H2O2
Source: Royal Society of Chemistry journal article supplement (doi:10.1039/c3ra44834g), 2013-11-11
Supplement: c3ra44834g.pdf [file c3ra44834g.pdf]

## ***In situ* growth of the Rh nanoparticles with controlled sizes and dispersions on the cross-linked PVA/PEI nanofibers and their electrocatalytic properties towards H<sub>2</sub>O<sub>2</sub>**

Han Zhu<sup>a</sup>, Ming Zhang<sup>\*a,b</sup>, ShengYing Cai<sup>a</sup>, YingTing Cai<sup>a</sup>, Pan Wang<sup>a</sup>, ShiYong Bao<sup>a</sup>, MeiLing Zou<sup>a</sup>, MingLiang Du<sup>a,b</sup>

[a] Department of Materials Engineering, College of Materials and Textile, Zhejiang Sci-Tech University, Hangzhou 310018, P. R. China

[b] Key Laboratory of Advanced Textile Materials and Manufacturing Technology (Ministry of Education), Zhejiang Sci-Tech University, Hangzhou 310018, P. R. China.

E-mail: [zhangming@zstu.edu.cn](mailto:zhangming@zstu.edu.cn)

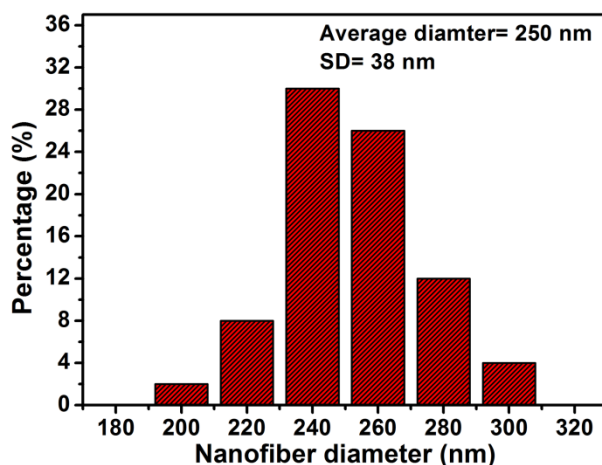

Figure S1 Diameter distribution diagram of the PVA/GA nanofibers.

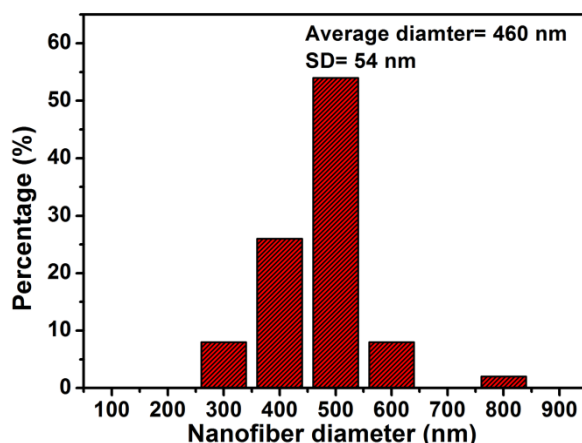

**Figure S2** Diameter distribution diagram of the cross-linked PVA nanofibers via GA vapor.

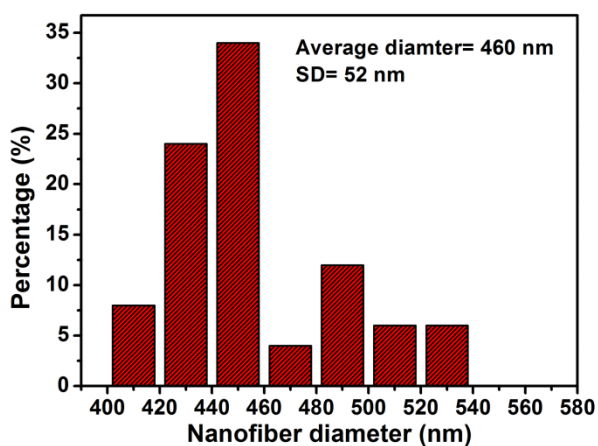

**Figure S3** Diameter distribution diagram of the cross-linked PVA/PEI nanofibers via GA vapor.

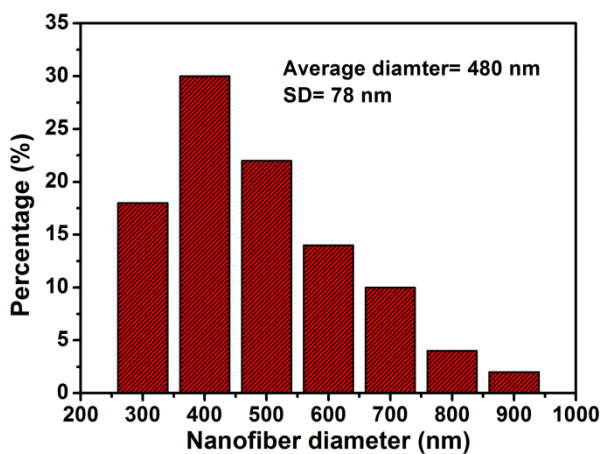

**Figure S4** Diameter distribution diagram of the cross-linked PVA/PEI nanofibers via GA vapor after soaking in water for 72 h.

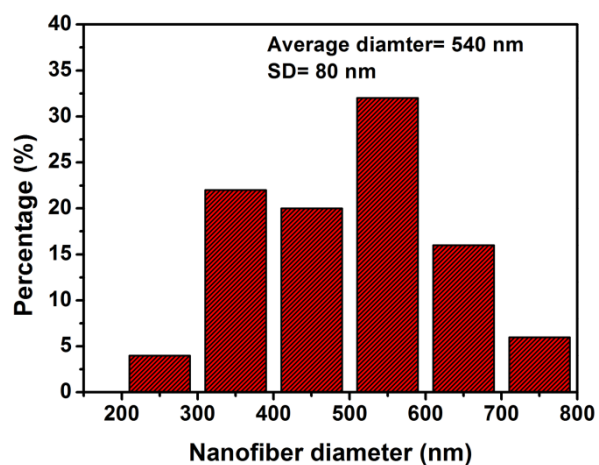

**Figure S5** Diameter distribution diagram of the RhNPs/(PVA/PEI) nanofibers.

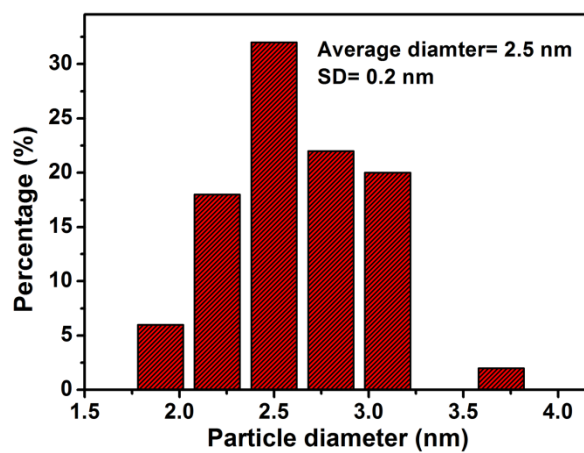

**Figure S6** Diameter distribution diagram of the RhNPs grown on the PVA/PEI nanofibers.

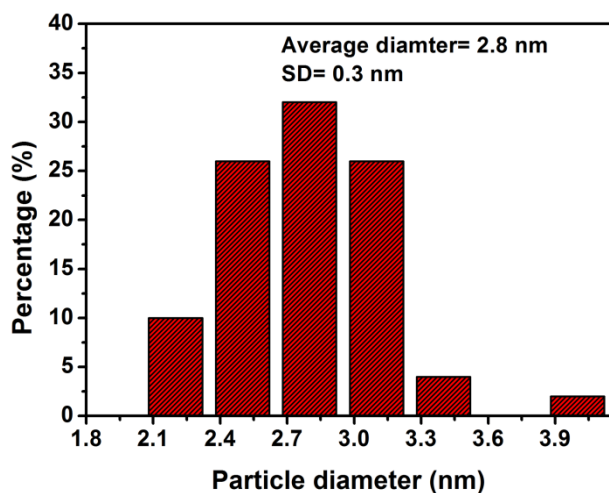

Figure S7 Diameter distribution diagram of the pre-synthesized RhNPs in water.

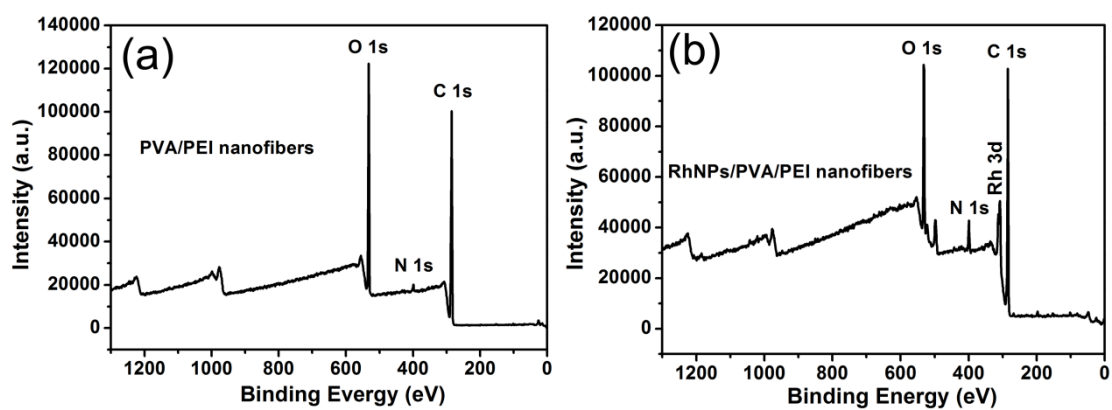

Figure S8 XPS spectra of the cross-linked PVA/PEI and RhNPs/(PVA/PEI) nanofibrous mats
